# Supplementary material for: Effective Modes of Transboundary Water-Related Cooperation to Turn Future Climate Conflict Risks into Opportunities
Source: Research Square preprint supplement (doi:10.21203/rs.3.rs-6847954/v1), 2025-06-20
Supplement: Supplementary file 1 [file 75188c7c924d5f6c19a48c3c.docx]

**Supplementary Materials S2. Parameters, Prompt, Psuedo-Code, and Literature Search Strategy for the MacDip Framework**

**LLM Hallucination Guardrail**

In the hallucination classification model, we tagged all instances of a successful prompt rendering with “0” and all hallucinated entries with “1.” Both entries tagged as definitely hallucinated and potentially hallucinated were tagged with a “1.” All of these augmented text entries were transformed to the TfIdf space with a 1000 word limit. A random forest classifier with a set random state (42) was trained and this model was used to generate probabilities of hallucination. Out of 1201 examined entries, 21 of them came back with over a 20% probability of hallucination. GPT was then prompted to regenerate descriptions of the article, with the additional request to “Ensure all details are factual and grounded in the provided event description.” Regenerated descriptions were then plugged back in to ensure the new description was deemed accurate.

**Pseudo code**

*For row in hallucination spreadsheet:*

*Status=1 if confirmed potential hallucination*

*Status=0 otherwise*

*Train random forest classifier based on augmented text and 0s/1s.*

*Run random forest classifier on all unchecked texts*

*For all texts with over 20% probability of incorrect augmented text:*

*Reaugment with prompt below until corrected*

**Prompt**

*“You are a political scientist with expertise in historical data, particularly in water cooperation, conflict, environmental peacebuilding, and water diplomacy. Your task is to enrich the description of a provided Water Resources Collaborative event to help analyze aspects such as technical assistance, diplomatic measures, and stakeholder participation. Ensure all details are factual and grounded in the provided event description. Avoid adding unverified information or hallucinations. Year: {year}, Event_text: '{event_text}', For each event, expand the description by focusing on Forms of water cooperation, Key actors and their roles, Technical assistance, Diplomatic measures, Stakeholder participation. Respond with an expanded, accurate description”*

**Embeddings and Clustering**

Each of 1713 news articles relating directly to acts of water cooperation were embedded using OpenAI’s API with 5 maximum retries allowed. We used k-means clustering to sort these embeddings into n different clusters. In order to determine the optimal number of clusters, we calculated and plotted the corresponding inertia of the cluster for potential n values ranging from 1 to 25. We noted an albeit slight change in slope between 5-7 clusters, and hence chose 7 as an acceptable optimal cluster count. We then generated a new sheet assigning each embedding to a cluster.


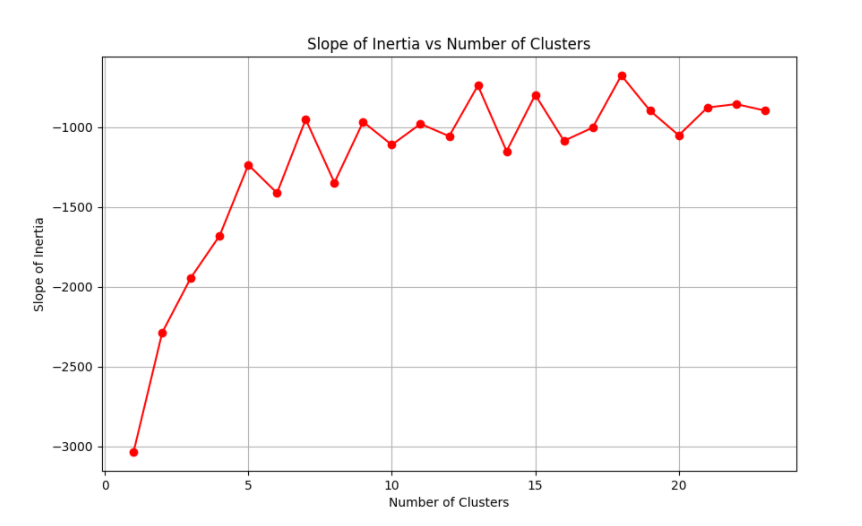

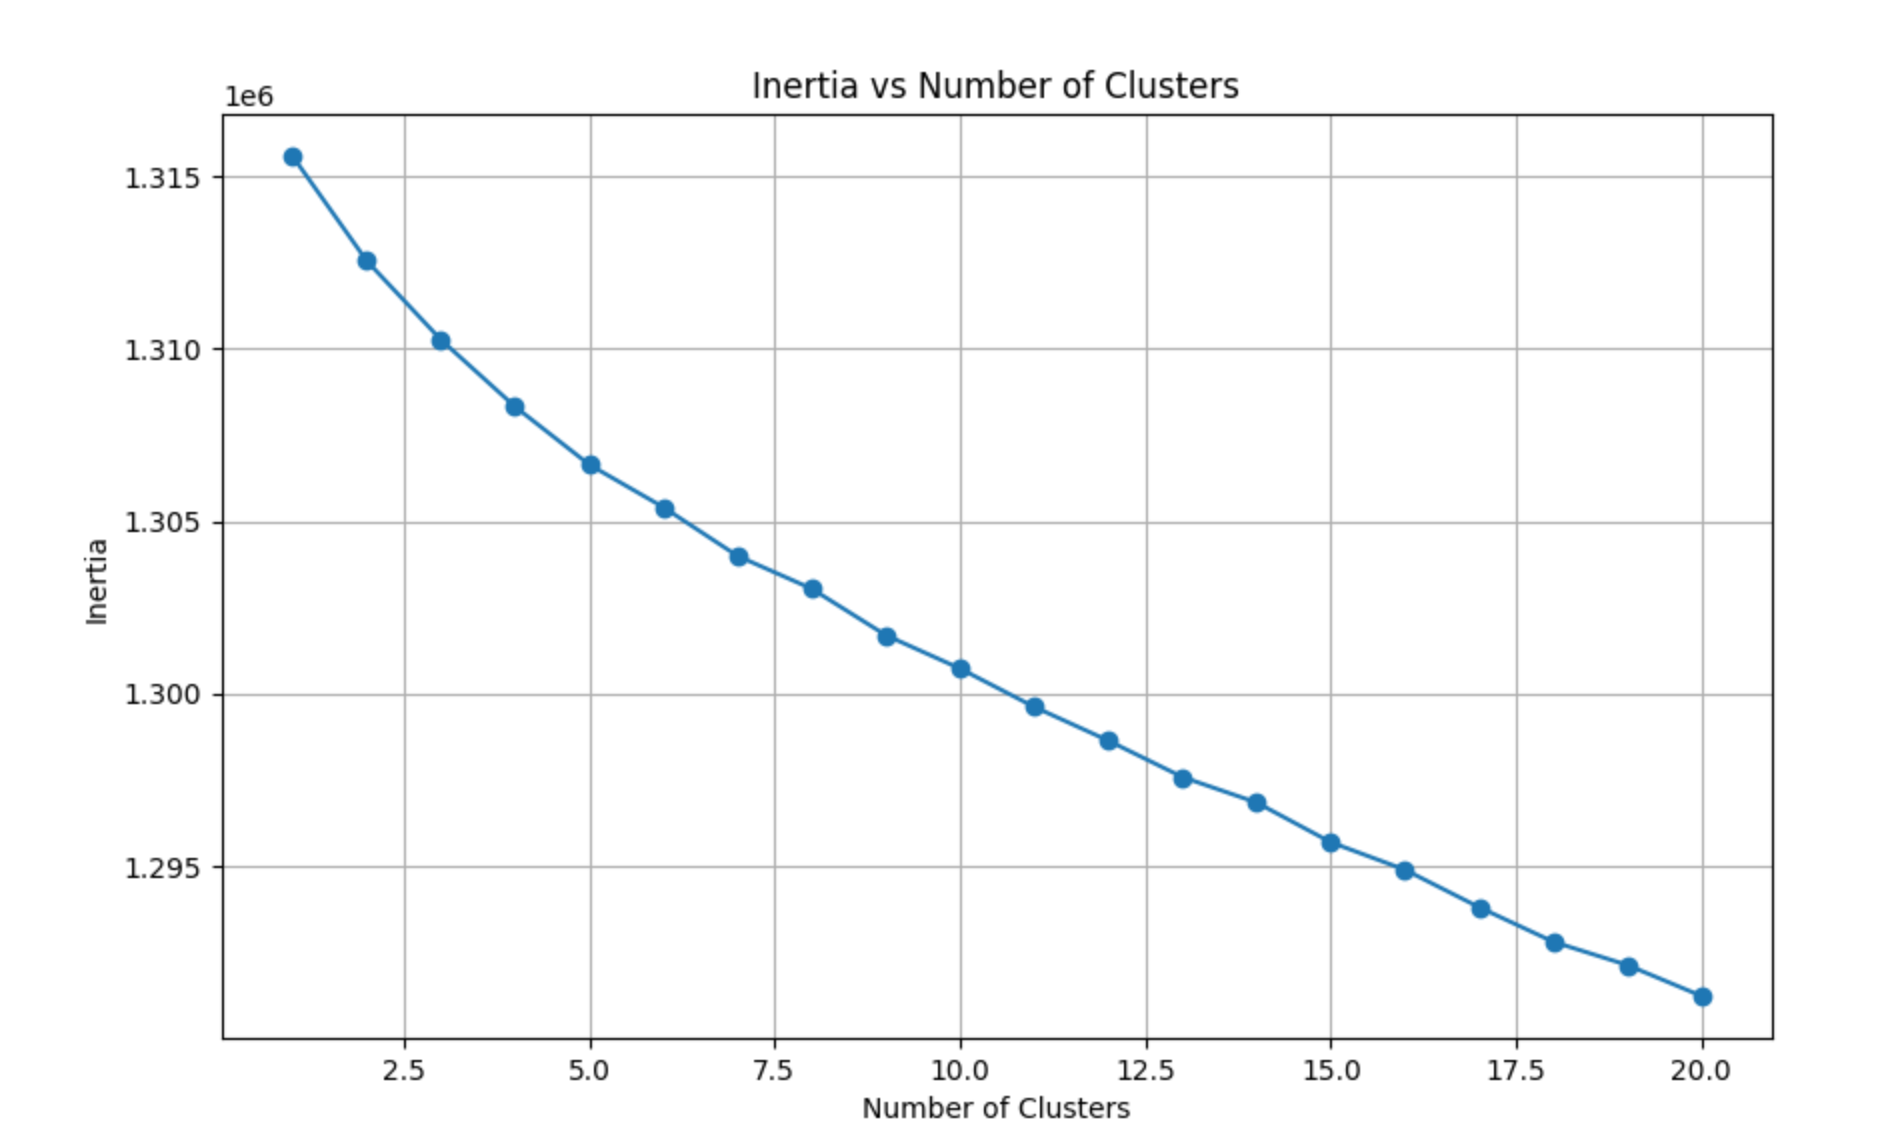


Figure S1. Metrics for the Optimal Number of Clusters Identification

**Search strategy**

The keyword search was conducted in the Web of Science (WoS) Core Collection in September 2024, covering the period from 2010 to the present. After removing duplicates, 1,513 articles were identified, with the document type limited to "article."

(TS=(environment) AND TS=(water resource) AND (TS=(cooperation) OR TS=(conflict) OR TS=(peacebuilding) OR TS=(governance) OR TS=(diplomacy))) AND (PY==("2025" OR "2024" OR "2023" OR "2022" OR "2021" OR "2020" OR "2019" OR "2018" OR "2017" OR "2016" OR "2015" OR "2014" OR "2013" OR "2012" OR "2011" OR "2010") AND DT==("ARTICLE"))

**Inclusion criteria and exclusion criteria**

The research focuses on water-related peacebuilding, cooperation, and conflict, examining how certain forms of cooperation effectively promote peacebuilding while others do not. The goal of the literature review is to gather scholarly terminology to better categorize and identify different approaches to water cooperation.

- Articles must specifically address environmental cooperation, particularly in the context of water resources, as a means of peacebuilding. Studies solely about environmental issues or water management without a connection to peacebuilding or conflict resolution are excluded.
- Articles should focus on specific policy and diplomatic tools or mechanisms used for managing transboundary water resources. Studies that only offer a general framework or toolbox for water diplomacy without specifically addressing transboundary water cooperation are excluded.
- Articles should be relevant to the benefits of water cooperation, such as improved inter-state relations, trust-building, and conflict prevention through water management. Studies that focus on economic, technical, or other non-diplomatic benefits of water management are excluded.

**Study selection**

We follow the PRISMA-P (preferred reporting items for systematic review and meta-analysis protocols) guidelines in the reporting of this systematic review process (see Figure S1). We After screening titles and abstracts based on the inclusion and exclusion criteria, we retained 126 papers for further analysis.

The full-text screening focused on factors such as relevance to the research question, the authors' field of expertise, and the quality of the study methodology. As a result, we selected 73 articles to include in our RAG database.


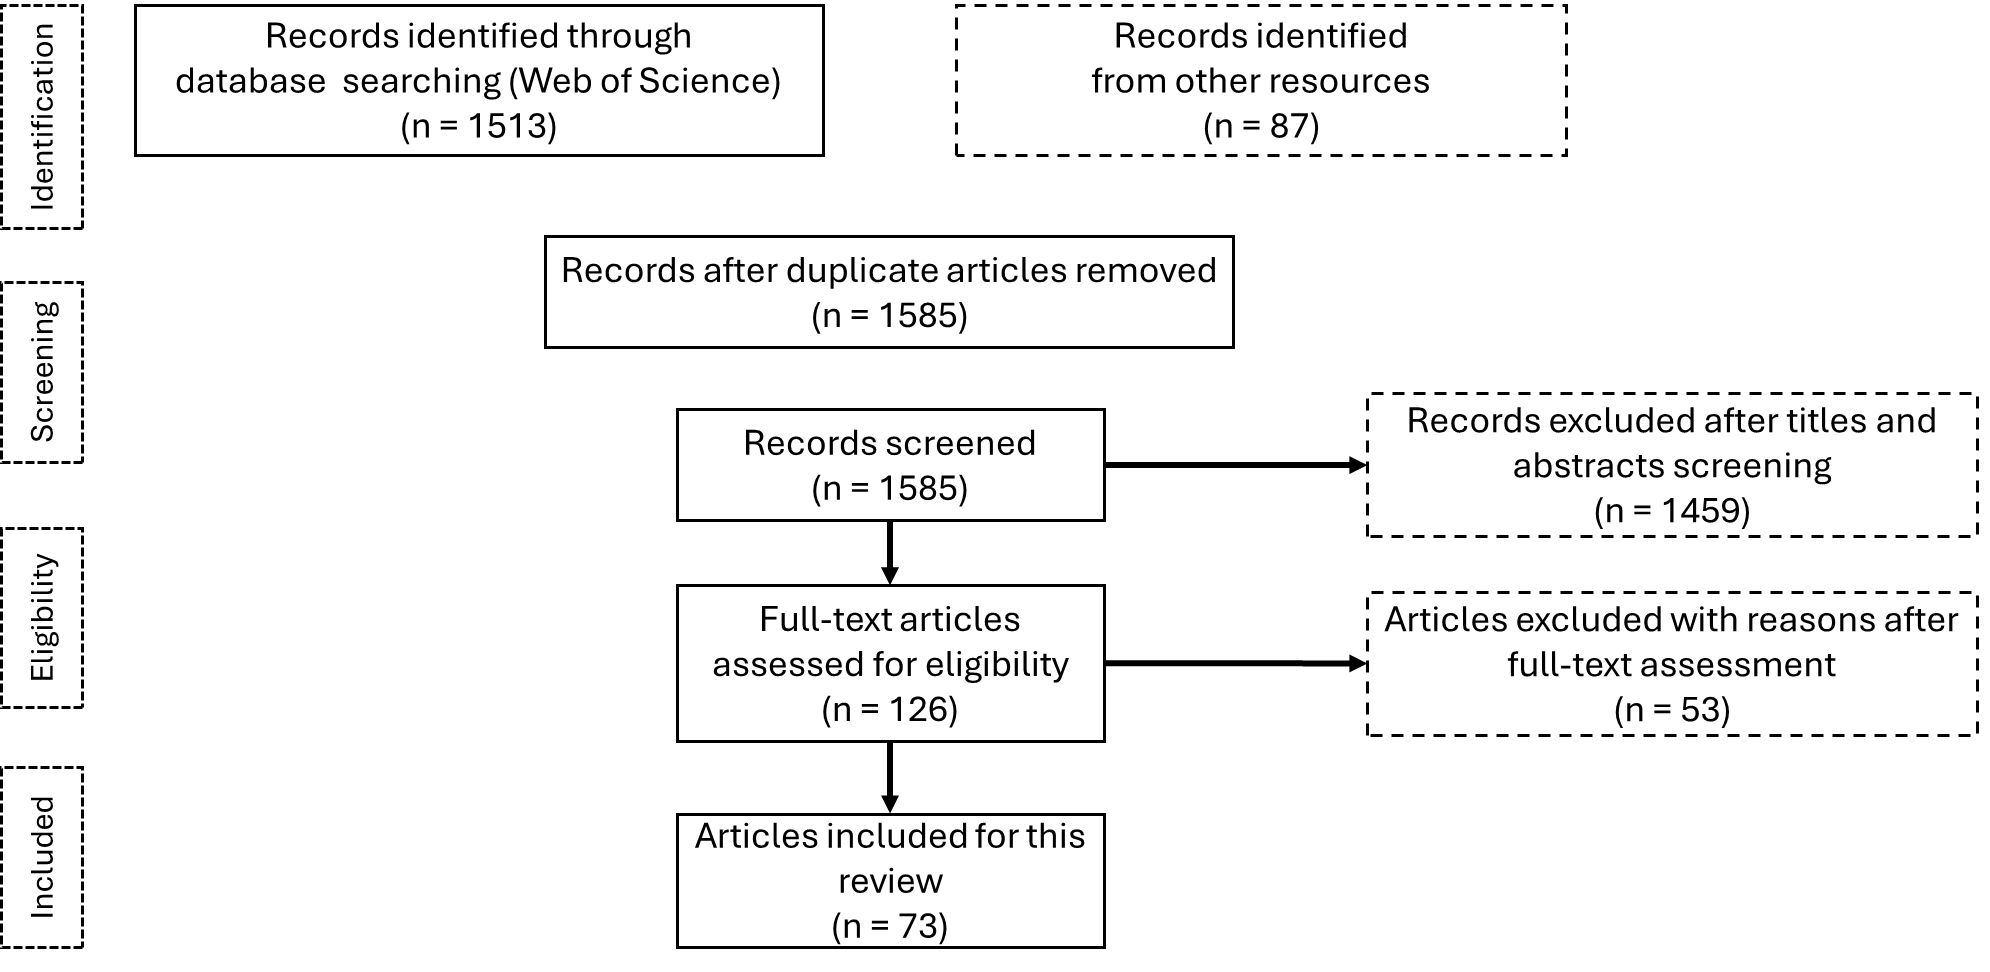


Figure S2 PRISMA Flow Diagram

**Data extraction**

Key information for selected articles were extracted by Zotero, manually checked, and stored in a Microsoft Excel spreadsheet. Data includes the publication (authors, title, journal, year, doi), and main content (keyword, abstract). Non-English articles had their abstracts translated for selection and the entire article translated for subsequent model analysis.

**RAG-Driven Label Refinement**

In order to complete our RAG analysis, we also incorporated various relevant literature. Since these articles could be lengthy, we split all of the texts into chunks that had fewer than 8192 tokens each. Each of these texts went through two sets of 1572-dimensional embedding which were then combined, leading to one 3072-dimensional embedding.

Following the embeddings, we randomly selected 5 news articles from each of the 7 pre-determined clusters. We retrieved the top 5 most relevant pieces of literature from the literature dataset using cosine similarity amongst the embeddings (embeddings were cropped to 1536 dimensions to match dimensionality). These news articles were summarized and then combined with the news articles to form a RAG pipeline that prompts GPT to “create a concise and descriptive label, a brief description, and 3 examples that reflect the core theme of this cluster.” This was run 3 times for each cluster - once from an International Relations, Sustainable Science, and Hydrology perspective.

These labels were put through a highly specific prompt:

*"You are an expert in international relations, sustainability, and water diplomacy. We have 21 labels, each reflecting a scholar’s perspective on recent news clusters. Your task is to refine these labels aggressively, aiming for fewer than 10 highly specific and narrowly defined labels. Each label should be no more than 4-5 words and focus on a distinct, tangible aspect of transboundary water management, such as 'joint data-sharing systems,' 'cross-border basin agreements,' 'adaptive flood management,' or 'integrated drought risk protocols.' Avoid broad or vague terms like 'environmental peacebuilding,' 'conflict resolution,' or 'water diplomacy,' and do not use general terms like 'frameworks' or 'initiatives.' Labels should clearly reflect precise mechanisms, governance approaches, collaborative models, or technical measures related to water cooperation. Ensure that the labels do not refer to any specific region, time frame, or controversial case, like the Colorado River Compact, Murray-Darling Basin Plan, Three Gorges Dam, or GERD. The final list should feature distinctive and non-overlapping labels that capture unique aspects of transboundary cooperation. Return only the refined list of concise, specific labels, without explanations or additional text."*

Finally, we prompt once more for a description and specific corresponding examples for each of our new cluster titles.

*“You are an international relations expert specializing in water diplomacy, sustainability science, and hydrology. Ensure that all examples reflect cooperative transboundary water management, are highly specific, and do not include references to contentious cases. Based on the following label, write a detailed description and provide {batch_size} unique examples of real-world events or cases that match this label. Make sure that no example refers to the same event as any previously generated example. Exclude examples like the Colorado River Compact (1922), Murray-Darling Basin Plan (Australia), Three Gorges Dam (China), and Grand Ethiopian Renaissance Dam (GERD, Ethiopia). Ensure that the examples are distinct, specific, and relevant to transboundary cooperation. Write a paragraph explaining what this label means, followed by relevant examples."*

We ensured that no overlaps occurred with an additional GPT check (“You are an expert in identifying if two event titles refer to the same underlying case, even if worded differently. If the new event title refers to the same event as any of the existing titles, respond with 'Yes'. Otherwise, respond with 'No'.").

**Pseudo code**

*For each cluster:*

*Sample 5 news articles.*

*Use cosine similarity to find 5 most relevant literature and “Summarize the following text into a concise paragraph, highlighting only the main points”*

*For each of three scholar types (“International Relations", "Sustainable Science", "Hydrology”):*

*"Using the knowledge from the following events and summarized literature, generate a specific label for this news cluster. The events and literature are provided below. Create a concise and descriptive label, a brief description, and 3 examples that reflect the core theme of this cluster."*

*Combine all of these using final GPT prompt*
