# Supplementary material for: Effective Modes of Transboundary Water-Related Cooperation to Turn Future Climate Conflict Risks into Opportunities
Source: Research Square preprint supplement (doi:10.21203/rs.3.rs-6847954/v1), 2025-06-20
Supplement: Supplementary file 2 [file 9098305ca7c665f0d072c8f7.docx]

# Supplementary Materials 1. Description of Identified Water-Related Cooperation Modes

Table 1 Comparison of LLM-augmented water cooperation and conflict dataset to previous mainstream datasets

| **Dataset Name** |  | **Type** | **Time Coverage** | **Data Sources** | **Key Features** | **Innovations/Strengths** |
| --- | --- | --- | --- | --- | --- | --- |
| **TFDD** |  | Cooperation & Conflict | 1948–2008 | News databases, political science databases, BAR rating system. | Focuses on international/transboundary events; uses a conflict-cooperation scale | Provides structured coding of cooperation intensity but lacks post-2008 updates. Limited to formal treaties and transboundary agreements. |
| **WCC** |  | Conflict | Pre-0 BCE–2019 | Media reports, conflict studies, public databases tracking violence. | Includes internal and international conflicts; emphasizes violence as a trigger | Broader temporal coverage than TFDD but focuses solely on conflict. Excludes non-violent disputes and cooperation events. |
| **LLM Paper’s Dataset** |  | Cooperation & Conflict | 1951–2019 | Merged TFDD and WCC, augmented with events from web scraping, LLM-augmentation and expert validation. | Combines cooperation and conflict events; integrates socioeconomic, climatic, and geographic variables | **Key Innovations:** 1. **LLM-augmented data**: Fills gaps in historical records using AI-generated plausible events with hallucination guardrails. 2. **Extended analysis**: Integrates qualitative (NLP) and quantitative (ML) methods to evaluate cooperation effectiveness. 3. **Comprehensive coverage**: Validates events through human-AI collaboration, reducing reporting bias and improving robustness. |

# Final Label: 1. Joint Data-Sharing Systems

**Label Explanation**

A Joint Data-Sharing System refers to a collaborative framework established between two or more countries or regions that share a transboundary water body, such as a river, lake, or aquifer. This system involves the systematic collection, exchange, and analysis of hydrological, meteorological, and environmental data to support informed decision-making, sustainable water management, and conflict prevention. The sharing of data enhances transparency, builds trust among stakeholders, and facilitates coordinated responses to water-related challenges such as droughts, floods, and pollution.

**Event Example**

***1. Mekong River Commission (MRC):***

One of its key initiatives is the development of a joint data-sharing system for hydrological and environmental data.

***2. International Commission for the Protection of the Danube River (ICPDR):***

The ICPDR, involving 14 countries and the European Union, focuses on the sustainable management of the Danube River Basin. A critical component of its work is the Danube River Basin Management Plan, which includes a well-established data-sharing system.

***3. Nile Basin Initiative (NBI):***

The Nile Basin Decision Support System (DSS) is a sophisticated tool within the NBI framework that integrates data from member countries, including hydrological, meteorological, and socio-economic data.

***4. Lake Victoria Basin Commission (LVBC):***

The LVBC has developed the Regional Water Resources Information System (RWRIS), which enables member states to share data on lake levels, water quality, and meteorological conditions.

***5. Sava River Basin Commission (ISRBC):***

The ISRBC oversees a joint data-sharing system known as the Sava GIS, which consolidates hydrological, meteorological, and environmental data from member countries.

# Final Label: 2. Cross-Border Basin Agreements

**Label Explanation**

Cross-border basin agreements refer to formal arrangements between two or more countries that share a river basin, aiming to manage and utilize the shared water resources cooperatively and sustainably. These agreements typically involve coordinated efforts in water allocation, conservation, flood control, pollution reduction, and ecosystem preservation. They are designed to promote mutual benefits, prevent conflicts, and ensure that the needs of all riparian states are met equitably. Successful cross-border basin agreements often include mechanisms for joint monitoring and dispute resolution, fostering a spirit of collaboration and trust among the involved nations.

**Event Example**

***1. The Guarani Aquifer Agreement***

The Guarani Aquifer, one of the largest transboundary aquifer systems in the world, is shared by Argentina, Brazil, Paraguay, and Uruguay. In 2010, these countries signed the Guarani Aquifer Agreement to establish a legal and institutional framework for the sustainable management and preservation of the aquifer.

***2. North Western Sahara Aquifer System (NWSAS)***

Shared by Algeria, Libya, and Tunisia, the NWSAS is a critical water resource in a largely arid region. The three countries have established a cooperative framework through the Sahara and Sahel Observatory (OSS) to manage the aquifer sustainably.

***3. Indus Waters Treaty (IWT):***

Signed in 1960 between India and Pakistan, the Indus Waters Treaty facilitated the cooperative management of the Indus River Basin. The treaty allocates the waters of the Indus and its tributaries between the two countries, with mechanisms for resolving disputes and ensuring mutual benefits. The Permanent Indus Commission established under the treaty meets regularly to discuss water distribution and address any issues, maintaining a stable and cooperative relationship regarding water resources.

# Final Label: 3. Transboundary Water Quality Standards

**Label Explanation**

Transboundary water quality standards refer to the agreed-upon criteria and regulations established by countries sharing a water body, such as a river, lake, or aquifer to rehabilitate degraded water bodies, restore ecosystems, and address pollution. These standards are crucial for preventing pollution, protecting ecosystems, and ensuring the availability of clean water for all riparian nations. These initiatives typically focus on improving water quality, restoring habitats, and promoting sustainable resource use.

**Event Example**

1. ***The Great Lakes Water Quality Agreement (GLWQA)***

A bilateral agreement between the United States and Canada, the GLWQA focuses on restoring and maintaining the chemical, physical, and biological integrity of the Great Lakes Basin ecosystem. The agreement includes specific water quality objectives and standards, as well as collaborative monitoring and reporting mechanisms.

1. ***The Lake Tanganyika Authority (LTA)***

Formed by the riparian countries of Burundi, Democratic Republic of Congo, Tanzania, and Zambia, the LTA aims to protect and sustainably manage Lake Tanganyika, one of the largest and oldest freshwater lakes in the world. The Strategic Action Programme developed by the LTA includes transboundary water quality standards to combat pollution and preserve the lake's biodiversity.

1. ***Rhine Action Plan (Europe)***

*The Plan has significantly improved water quality and restored fish populations through cooperation among several European nations.*

1. ***Amazon Cooperation Treaty Organization (South America):***

*The Organization works to restore aquatic ecosystems in the Amazon Basin, addressing deforestation and pollution threats.*

# Final Label: 4. Coordinated Hydropower Operations

**Label Explanation**

The label "Coordinated Hydropower Operations" refers to the collaborative management and operation of hydropower facilities by two or more countries sharing a transboundary watercourse. This coordination aims to optimize the production of electricity, ensure equitable water distribution, manage flood risks, and support environmental sustainability. Such cooperation often involves synchronized dam releases, shared data on water flows and meteorological conditions, and joint decision-making frameworks to balance various needs, including energy production, agricultural irrigation, and ecosystem preservation.

**Event Example**

***1. Zambezi River Basin (Zambia and Zimbabwe)***

The Zambezi River Authority (ZRA) manages the Kariba Dam, which straddles the border between Zambia and Zimbabwe. The ZRA ensures the coordinated operation of the dam to maximize hydropower generation while considering the seasonal variations in water flow.

***2. Lac de Constance (Lake Constance) (Austria, Germany, and Switzerland)***

The International Commission for the Protection of Lake Constance (IGKB) facilitates cooperation among Austria, Germany, and Switzerland in managing the hydropower plants around Lake Constance.

***3. Niagara River (USA and Canada)***

The International Niagara Board of Control oversees the coordinated operation of hydropower plants on the Niagara River, which forms part of the border between the USA and Canada.

***4. Senegal River Basin (Senegal, Mali, Mauritania, and Guinea)***

The Organization for the Development of the Senegal River (OMVS) coordinates the operation of the Manantali Dam, which affects hydropower production in Senegal, Mali, and Mauritania. The OMVS ensures that the hydropower generation is balanced with the needs for irrigation, flood control, and ecological preservation, benefiting all member countries.

# Final Label: 5. Joint Water Allocation Models

**Label Explanation**

Joint water allocation models refer to collaborative frameworks and mathematical models developed and implemented by multiple countries or regions sharing a transboundary water source. These models are designed to equitably allocate water resources among the stakeholders based on agreed criteria, which can include factors such as water availability, demand, environmental sustainability, and socio-economic considerations. The goal is to optimize the use of shared water resources in a manner that minimizes conflicts, promotes cooperation, and ensures sustainable management.

**Event Example**

***1. The Zambezi Watercourse Commission (ZAMCOM) Integrated Water Resources Management Strategy:***

ZAMCOM, which includes eight riparian states (Angola, Botswana, Malawi, Mozambique, Namibia, Tanzania, Zambia, and Zimbabwe), has developed an integrated water resources management (IWRM) strategy that includes a joint water allocation model.

***2. Guarani Aquifer Agreement***

This agreement between Argentina, Brazil, Paraguay, and Uruguay aims to ensure the sustainable management of the Guarani Aquifer, one of the world's largest transboundary groundwater reserves. The agreement emphasizes cooperation in monitoring and managing the aquifer, promoting equitable water use, and protecting the resource from contamination. It establishes a framework for joint research and capacity-building initiatives to support the sustainable use of the aquifer's water.

***3. Orange-Senqu River Commission (ORASECOM) Agreement (2000)***

ORASECOM was established by South Africa, Lesotho, Botswana, and Namibia to manage the Orange-Senqu River Basin collaboratively. The agreement focuses on equitable water distribution, sustainable development, and environmental conservation. It provides a platform for joint decision-making, data sharing, and coordinated management activities, ensuring that all member countries benefit from the river's resources while protecting its ecological integrity.

# Final Label: 6. Collaborative Planning and Adaptation Strategies

**Label Explanation**

Collaborative Planning and Adaptation Strategies refers to the process where multiple stakeholders, work together to manage and utilize a shared river basin sustainably, and to address the impacts of climate change on shared water resources. This cooperative approach involves joint decision-making, integrated water resource management, conflict resolution, mitigate risks, and enhance resilience to climate-related challenges, and the harmonization of policies. Collaborative planning typically includes joint monitoring, the establishment of shared governance structures, water conservation, infrastructure improvements, capacity building, and to respond to crises such as floods, droughts, and pollution incidents

**Event Example**

***1. Indus Waters Treaty (India and Pakistan)***

Includes provisions for hydrological data sharing during monsoon seasons to prevent catastrophic flooding.

***2. The Lake Victoria Basin Commission (LVBC) Climate Adaptation Program***

Lake Victoria, bordered by Kenya, Uganda, and Tanzania, is managed by the LVBC. The Commission has developed a Climate Adaptation Program to address the lake's vulnerability to climate change. The program focuses on joint efforts to improve water quality, manage fisheries sustainably, and reduce the impact of extreme weather events.

***3. The Sava River Basin Framework Agreement on Climate Change Adaptation***

The Sava River flows through Slovenia, Croatia, Bosnia and Herzegovina, and Serbia. The Framework Agreement on Climate Change Adaptation outlines joint actions such as improving flood forecasting and warning systems, developing drought management plans, and fostering public awareness and stakeholder engagement in climate adaptation efforts.

1. **SADC Drought Early Warning System (Southern Africa)**

Helps countries like Botswana, Namibia, and South Africa prepare for and respond to severe drought conditions.
