# Supplementary material for: Effective Modes of Transboundary Water-Related Cooperation to Turn Future Climate Conflict Risks into Opportunities
Source: Research Square preprint supplement (doi:10.21203/rs.3.rs-6847954/v1), 2025-06-20
Supplement: Supplementary file 4 [file f72591d82b970d8480d2fe6e.docx]

# Supplementary Materials S3. Inter-Coder Reliability Tests Process

**1.  Sampling and Grouping of Events:**

From the event description file, there are 1713 events. Each event may involve multiple modes, so the modes are not fully categorized at the start.

For each mode, events are selected step by step:

Mode 1: Select three events related to this mode.

Mode 2: Select three events related to this mode.

Mode 3: Select three events related to this mode.

And so on for all modes.

After selecting three events for each mode, these events are combined to create a total of 18 events in the questionnaire. The 18 events are then presented in random order to the participants.

**2.  Questionnaire Design:**

Each coding task in the questionnaire consists of two options for each event:

Option 1: The mode that the large language model believes is relevant to the event.

Option 2: A mode that the large language model did not identify as relevant to the event.

The participant’s task is to choose the most appropriate mode for the event from these two options.

**3.  Data Collection:**

Each participant is assigned a set of 18 events to code, with the events randomly ordered.

The participants manually code each event by selecting one of the two options provided. The participants manually code each event by selecting one of the two options provided.

**4.  Agreement Scoring:**

- When conducting a consistency study, we define the large language model's coding as consistent with the manual coding if the coding of an item by both the large language model and the manual coder match. Specifically:

· If the manual coding of an event is 1, and the large language model also codes the event as 1, the coding is considered consistent and is marked as 1.

· If the manual coding is 0, but the large language model codes the event as 1, the coding is considered inconsistent and is marked as 0.

The inter-coder reliability test simply calculates percent of agreement for each of the identified water-related cooperation modes. Kappa coefficient is not applicable, since for each identified mode, we can only compare the sampled events with the coding by LLM to whether human coders also chose the code. Thus, there is no false positive available to perform Kappa coefficient calculation.

Inter-coder reliability test results:

**Table S1. Agreement of the inter-coder reliability test**

| **Reliability Test (20 coders)** | |
| --- | --- |
| **Summary Statistics** |  |
| **Agreements** | 0.712 |
| **Category-wise Statistics** |  |
| **Cooperation Modes** | **Agreements** |
| Joint Data-Sharing Systems | 0.717 |
| Cross-Border Basin Agreements | 0.583 |
| Transboundary Water Quality Standards | 0.733 |
| Coordinated Hydropower Operations | 0.808 |
| Joint Water Allocation Models | 0.708 |
| Collaborative River Basin Planning | 0.725 |

**The questionnaire for this reliability test.**

**Reliability Test Questionnaire of Modes of Water-related Cooperation**

Thank you for participating in the manual coding work of our research project! This questionnaire can take from 20 minutes to 1 hour, depending on your approach.

Our project focuses on identifying patterns that can reduce water-related conflicts worldwide and predicting the extent to which these patterns can mitigate such conflicts in the future thereby bringing benefits to the world. We have utilized Large Language Models(LLM) in our project, and your coding results will be used to verify the reliability of the LLM clustering outcomes.

Here, "coding" means categorizing news texts based on Modes of Water-related Cooperation to verify the reliability of LLM clustering results.

Next, you'll read an explanation of the six collaboration modes to give you some idea of each option before coding.

Mode1: Joint Data-Sharing Systems

A Joint Data-Sharing System refers to a collaborative framework established between two or more countries or regions that share a transboundary water body, such as a river, lake, or aquifer. This system involves the systematic collection, exchange, and analysis of hydrological, meteorological, and environmental data to support informed decision-making, sustainable water management, and conflict prevention. The sharing of data enhances transparency, builds trust among stakeholders, and facilitates coordinated responses to water-related challenges such as droughts, floods, and pollution.

One of the key initiatives of the Mekong River Commission (MRC) is the development of a joint data sharing system for hydrological and environmental data. Does it belong to the Joint Data Sharing Systems?

-Yes.

Mode2: Cross-Border Basin Agreements

Cross-border basin agreements refer to formal arrangements between two or more countries that share a river basin, aiming to manage and utilize the shared water resources cooperatively and sustainably. These agreements typically involve coordinated efforts in water allocation, conservation, flood control, pollution reduction, and ecosystem preservation. They are designed to promote mutual benefits, prevent conflicts, and ensure that the needs of all riparian states are met equitably.

In 2010, these countries signed the Guarani Aquifer Agreement to establish a legal and institutional framework for the sustainable management and conservation of the aquifer. Is it one of the cross-border river basin agreements?

-Yes.

Mode3: Transboundary Water Quality Standards

Transboundary water quality standards refer to the agreed-upon criteria and regulations established by countries sharing a water body, such as a river, lake, or aquifer, to maintain or improve the quality of water. These standards are crucial for preventing pollution, protecting ecosystems, and ensuring the availability of clean water for all riparian nations. Cooperative transboundary water management involves collaborative efforts, often facilitated by international agreements or organizations, to monitor, maintain, and enhance water quality across borders. Effective implementation of these standards typically requires joint monitoring programs and coordinated policies to address sources of pollution and mitigate their impacts.

The Great Lakes Water Quality Agreement (GLWQA) is a bilateral agreement between the United States and Canada that focuses on restoring and maintaining the chemical, physical and biological integrity of the Great Lakes Basin ecosystem. The agreement includes specific water quality goals and standards, as well as cooperative monitoring and reporting mechanisms. Is it one of the transboundary water quality standards?

-Yes.

Mode4: Coordinated Hydropower Operations

The label "Coordinated Hydropower Operations" refers to the collaborative management and operation of hydropower facilities by two or more countries sharing a transboundary watercourse. This coordination aims to optimize the production of electricity, ensure equitable water distribution, manage flood risks, and support environmental sustainability. Such cooperation often involves synchronized dam releases, shared data on water flows and meteorological conditions, and joint decision-making frameworks to balance various needs, including energy production, agricultural irrigation, and ecosystem preservation.

The Zambezi River Authority (ZRA) manages the Kariba Dam, which straddles the border between Zambia and Zimbabwe. ZRA ensures the coordinated operation of the dam to maximise hydropower generation while taking into account seasonal variations in water flow. Is it part of coordinated hydropower operations?

-Yes.

Mode5: Joint Water Allocation Models

Joint water allocation models refer to collaborative frameworks and mathematical models developed and implemented by multiple countries or regions sharing a transboundary water source. These models are designed to equitably allocate water resources among the stakeholders based on agreed criteria, which can include factors such as water availability, demand, environmental sustainability, and socio-economic considerations. The goal is to optimize the use of shared water resources in a manner that minimizes conflicts, promotes cooperation, and ensures sustainable management.

The integrated water resources management strategy of the Zambezi River Commission (ZAMCOM):

ZAMCOM, which comprises eight riparian countries (Angola, Botswana, Malawi, Mozambique, Namibia, Tanzania, Zambia and Zimbabwe), has developed an Integrated Water Resources Management (IWRM) strategy that includes a Joint Water Allocation Model. Is it one of the Joint Water Allocation Models?

-Yes.

Mode6: Collaborative Planning and Adaptation Strategies

Collaborative Planning and Adaptation Strategies refers to the process where multiple stakeholders, often from different political or administrative regions, work together to manage and utilize a shared river basin sustainably, and to address the impacts of climate change on shared water resources. This cooperative approach involves joint decision-making, integrated water resource management, conflict resolution, mitigate risks, and enhance resilience to climate-related challenges, and the harmonization of policies. Collaborative planning typically includes joint monitoring, the establishment of shared governance structures, water conservation, infrastructure improvements, capacity building, and the implementation of coordinated action plans to address common challenges such as water scarcity, pollution, and ecosystem degradation.

The Meuse River Basin is shared by Belgium and the Netherlands, and both countries have implemented an adaptive flood management strategy through the Maaswerken project. Does it belong to Collaborative Planning and Adaptation Strategies?

-Yes.

**Next, there will be 18 events for you to code.**

Guidelines

Mode 1: Joint Data-Sharing Systems – Countries collaborate to collect, exchange, and analyze water-related data.

Mode 2: Cross-Border Basin Agreements – Formal agreements between countries to cooperatively manage shared river basins, ensuring sustainable water use, conflict prevention, and mutual benefits.

Mode 3: Transboundary Water Quality Standards – Countries set joint regulations to maintain water quality, prevent pollution, and protect ecosystems through monitoring and coordinated policies.

Mode 4: Coordinated Hydropower Operations – Countries jointly manage hydropower facilities to optimize energy production, regulate water distribution, and mitigate flood risks.

Mode 5: Joint Water Allocation Models – Shared frameworks and models allocate water equitably based on availability, demand, and sustainability, minimizing conflicts and promoting cooperation.

Mode 6: Collaborative Planning and Adaptation Strategies – Stakeholders work together on sustainable water management, climate adaptation, risk mitigation, and policy harmonization.

Event1:

In 1990, France provided Ghana with $45 million to improve water supply, electricity access, and expand rubber plantations, supporting infrastructure and economic development.

Which mode of cooperation below do you think is more likely to occur in the event text described above?

Joint Data-Sharing Systems

Joint Water Allocation Models

Event2:

In 1970, Japan loaned Turkey $30 million to build roads, bridges, and dams, strengthening bilateral ties and supporting infrastructure development. The dams were key for flood control, irrigation, and hydropower, exemplifying Japan's commitment to technical assistance and sustainable development.

Which mode of cooperation below do you think is more likely to occur in the event text described above?

Joint Data-Sharing Systems

Coordinated Hydropower Operations

Event3:

In 1992, Peru offered Ecuador access to the Amazon River for navigation and economic integration, aiming to resolve a 50-year border dispute, as announced by Peruvian Foreign Minister Augusto Blacker Miller during presidential talks in Ecuador.

Which mode of cooperation below do you think is more likely to occur in the event text described above?

Transboundary Water Quality Standards

Collaborative Planning and Adaptation Strategies

Event4:

The 1994 Danube River Convention promotes cooperation among sharing countries for sustainable management. It created the ICPDR, involving governments, NGOs, and civil groups, to support water quality monitoring, research, and pollution control.

Which mode of cooperation below do you think is more likely to occur in the event text described above?

Joint Data-Sharing Systems

Coordinated Hydropower Operations

Event5:

In 2002, the Upper Tisza Water Authority provided USD 29,000 in flood control equipment and sandbags to Ukraine’s Subcarpathia region under a Hungary-Ukraine agreement, highlighting water cooperation and the role of diplomacy and stakeholders in managing shared resources.

Which mode of cooperation below do you think is more likely to occur in the event text described above?

Cross-Border Basin Agreements

Transboundary Water Quality Standards

Event6:

In 1969, Yugoslavia and Libya signed a LL6.8 million contract for 12 dams, enhancing Libya's water security. Yugoslavia provided technical expertise, fostering diplomatic ties and future cooperation.

Which mode of cooperation below do you think is more likely to occur in the event text described above?

Cross-Border Basin Agreements

Coordinated Hydropower Operations

Event7:

In 1991, Libyan leader Muammar Gaddafi invited South Korean President Roh Tae-woo to Libya to enhance cooperation, particularly in water resources. Gaddafi sought South Korea’s expertise for his Great Man-Made River project, aiming for a collaborative approach to water management despite political differences.

Which mode of cooperation below do you think is more likely to occur in the event text described above?

Joint Data-Sharing Systems

Collaborative Planning and Adaptation Strategies

Event8:

In 1954, Turkey granted Great Britain construction rights for a dam, fostering cooperation between the two nations. The project involved various stakeholders and shared expertise.

Which mode of cooperation below do you think is more likely to occur in the event text described above?

Joint Water Allocation Models

Collaborative Planning and Adaptation Strategies

Event9:

In 1969, Sweden loaned $5 million to the Middle East to improve water supply, addressing regional water scarcity. The loan funded infrastructure development, promoting sustainable water management with local and stakeholder involvement.

Which mode of cooperation below do you think is more likely to occur in the event text described above?

Cross-Border Basin Agreements

Joint Water Allocation Models

Event10:

In 1994, the UN announced plans to repair sewage and water supply systems in southern Baghdad, Iraq, damaged by conflict. This initiative provided technical assistance to address water scarcity and improve sanitation, fostering stability and peace through collaboration with the Iraqi government and local communities.

Which mode of cooperation below do you think is more likely to occur in the event text described above?

Transboundary Water Quality Standards

Coordinated Hydropower Operations

Event11:

In 2005, after years of water scarcity, Rio Grande Valley farmers agreed that Mexico would repay its water debt to the U.S. Diplomatic negotiations, U.S. technical support, and farmer advocacy were key to resolving the issue.

Which mode of cooperation below do you think is more likely to occur in the event text described above?

Cross-Border Basin Agreements

Collaborative Planning and Adaptation Strategies

Event12:

In 1962, Japan loaned 468 million Yen to Laos for a waterworks project, providing technical assistance and involving local communities.

Which mode of cooperation below do you think is more likely to occur in the event text described above?

Transboundary Water Quality Standards

Joint Water Allocation Models

Event13:

In 1981, the 34th meeting of the Korean-Chinese Amnok River Hydroelectric Power Company led to a key decision, signed on November 22 by Korean director Chung-Song and Chinese director Ximing, also Vice Minister of the power industry. This agreement strengthened cooperation, ensuring efficient operation and fostering diplomatic ties through shared water resource management.

Which mode of cooperation below do you think is more likely to occur in the event text described above?

Coordinated Hydropower Operations

Joint Water Allocation Models

Event14:

In 2002, the Lower Bann Advisory Committee, Lower Bann Co-ordinating Committee, and local councils launched a joint investigation into the development of the Lower River Bann. This effort involved stakeholder collaboration, technical assessments, and water diplomacy to balance environmental, economic, and community interests. The initiative exemplified cooperative water resource management through shared expertise and consensus-building.

Which mode of cooperation below do you think is more likely to occur in the event text described above?

Cross-Border Basin Agreements

Transboundary Water Quality Standards

Event15:

In 1973, Mexico sent water drainage experts to Chile as a form of technical assistance, strengthening diplomatic ties through water cooperation. The experts assessed drainage issues, provided recommendations, and trained local personnel, relying on collaboration between both governments and local communities.

Which mode of cooperation below do you think is more likely to occur in the event text described above?

Joint Data-Sharing Systems

Cross-Border Basin Agreements

Event16:

In 1995, Bangladesh reaffirmed its commitment to the SAARC charter, emphasizing regional cooperation in economic, social, and technical fields, including water resource management. This commitment signaled its willingness to engage in water diplomacy, share hydrological data, and collaborate on sustainable water management with SAARC members through stakeholder participation and technical assistance.

Which mode of cooperation below do you think is more likely to occur in the event text described above?

Coordinated Hydropower Operations

Joint Water Allocation Models

Event17:

In 1996, the six Greater Mekong Sub-region (GMS) countries—Cambodia, China, Laos, Myanmar, Thailand, and Vietnam—agreed to collaborate with the Asian Development Bank (ADB) on two environmental projects for the Mekong River. Supported by ADB’s technical and financial assistance, these projects aimed to improve water quality, promote sustainability, and mitigate environmental risks.

Which mode of cooperation below do you think is more likely to occur in the event text described above?

Joint Data-Sharing Systems

Collaborative Planning and Adaptation Strategies

Event18:

In 2012, Japan, through JICA, provided N1.9 billion in aid to improve water resources in five Nigerian states. The funds aimed to enhance water supply, sanitation, and public health, demonstrating Japan’s commitment to water security and international cooperation.

Which mode of cooperation below do you think is more likely to occur in the event text described above?

Transboundary Water Quality Standards

Collaborative Planning and Adaptation Strategies
